# Supplementary material
Source: publisher site journal article supplement (https://www.dovepress.com/article/560398)
Supplement: Supplementary file 1 [file 560398_Appendix%201.docx]

| **Appendix 1: Case Collection Form for Cephalic Dystocia Under Epidural Analgesia During Labor** | | | | | | | | | | | | | |
| --- | --- | --- | --- | --- | --- | --- | --- | --- | --- | --- | --- | --- | --- |
| **Inclusion Criteria:** Women who delivered at the Affiliated Hospital of North Sichuan Medical College between 00:00 on January 1, 2021, and 00:00 on October 1, 2024, meeting the following conditions: - Hospitalized for delivery - Full-term pregnancy - Single live fetus - Cephalic presentation - Use of epidural analgesia during labor - Attempted vaginal delivery | | | | | | | | | | | | | |
| **Exclusion Criteria**: Maternal psychiatric disorders or cognitive impairment; cervical dilation > 6 cm at admission; conversion to cesarean section during labor due to maternal request or fetal distress; incomplete baseline data. | | | | | | | | | | | | | |
| **General Information** | | | | | | | | | | | | | |
| Hospital ID | |  | Urban Resident | | | □Yes □No | | | Occupation | □Mental Laborer □Manual Laborer | | | |
| Educational Level | |  | Age | | | years | | | Height | cm | | Pre-delivery Weight | kg |
| Gestational Week at Delivery | | Weeks___days | | | | | | | Parity | P | | | |
| Method of Conception | | □Spontaneous □ IVF □IUI | | | | | | | | | | | |
| Gestational Diabetes Mellitus | | □No □Yes（□Diet-controlled □Insulin ） | | | | | | | | | | | |
| Other Comorbidities | |  | | | | | | | | | | | |
| **Admission Examination** | | | | | | | | | | | | | |
| Uterine Height | | cm | Presenting Part Position | | |  | | | | | | | |
| Abdominal Circumference | | cm | Premature Rupture of Membranes | | | □No □Yes（Interval from PROM to admission:___h） | | | | | | | |
| Cervical Dilation on Admission | | cm |
| **Prenatal Ultrasound (Within One Week Before Delivery)** | | | | | | | | | | | | | |
| Biparietal Diameter | | mm | Head Circumference | | | mm | | | Abdominal Circumference | mm | | Amniotic Fluid Depth | mm |
| Nuchal Cord | | □No□Yes（ ） loops | | | | Fetal Position | | |  | Placental Location | | □Anterior □Posterior  □Lateral □Fundal | |
| **Intrapartum Course** | | | | | | | | | | | | | |
| Labor Onset | | □Spontaneous Onset □Induced (e.g., Oxytocin | | | | | | | | | | | |
| Vaginal Examination Timing | | Date/Time: YYYY-MM-DD HH:MM | | | | | | | Cervical Dilation /cm | | Presenting Part Station | | Fetal Position |
|  | |  | | | | | | |  | |  | |  |
| Active Phase Onset | | Date/Time: YYYY-MM-DD HH:MM | | | | | | |  | |  | |  |
| Full Cervical Dilation | | Date/Time: YYYY-MM-DD HH:MM | | | | | | |  | |  | |  |
| Timing of Dystocia Diagnosis | | □Active Phase □ Second Stage | | | | | | | Fetal Position & Station at Dystocia Diagnosis__ __ | | | | |
| Primary Cause of Dystocia | | □Fetal Malposition**（**□Persistent Occiput Transverse □Persistent Occiput Posterior □Sinicipital Presentation □Anterior/Posterior Asynclitism □Brow/Face/Mentum Presentation**）**  □Uterine Inertia □ Cephalopelvic Disproportion | | | | | | | | | | | |
| Maternal Abnormal Findings | | □Premature Bearing Down  □Cervical Edema □Urinary Retention  □Abdominal Distension  □Uterine Hypertonicity/Incoordination | | | | | | | | | | | |
| Prolonged Latent Phase □Yes □No | | | | | | | | Duration of Active Phase___h | | | | | |
| Delivery Outcome | | □Cesarean Section（□Latent Phase□Active Phase □Second Stage □Operative Vaginal Delivery | | | | | | | | | | | |
| **Neonatal Outcomes** | | | | | | | | | | | | | |
| Sex | |  | | Birth Weight | | | g | | 1-minute and 5-minutes Apgar Score | |  | | |
| Amniotic Fluid Status | | □Clear □Grade I □Grade II □Grade III | | | | | | | | | | | |
| **Maternal Postpartum Complications** | | | | | | | | | | | | | |
| Postpartum Hemorrhage | □Yes □No | | | | Associated Uterine Atony | | | | □Yes □No | | | | |
| Puerperal Infection | □Yes □No | | | | Severe Perineal Laceration | | | | □3rd Degree  □4th Degree | | | | |
